# Supplementary material
Source: publisher figshare collection journal article supplement (https://frontiersin.figshare.com/ndownloader/files/14490323)
Supplement: Supplementary file [file 14490323]

## *Supplementary Material*

# **Multi-scale Expressions of One Optimal State Regulated by Dopamine in the Prefrontal Cortex**

Guyue Hu, Xuhui Huang, Tianzi Jiang, Shan Yu\*

\* **Correspondence:** Shan Yu ([shan.yu@nlpr.ia.ac.cn](mailto:shan.yu@nlpr.ia.ac.cn))

## **1 Supplementary Figure**

**Figure S1. Results obtained with a different strength range**  $[A_{\min}, A_{\max}]$ . Behaviors at different levels corresponding to the grey trajectory in Fig. 1F are shown. All analyses and results are parallel to the ones in the main text. For working memory at the system level, A-B are similar to Fig. 2B-C, and C-G are similar to Fig. 2E-I. For criticality at the network level, H-I are similar to Fig. 3C-D. For detailed balance of excitatory and inhibitory at the cellular level, J-M are similar to Fig. 4A-D.

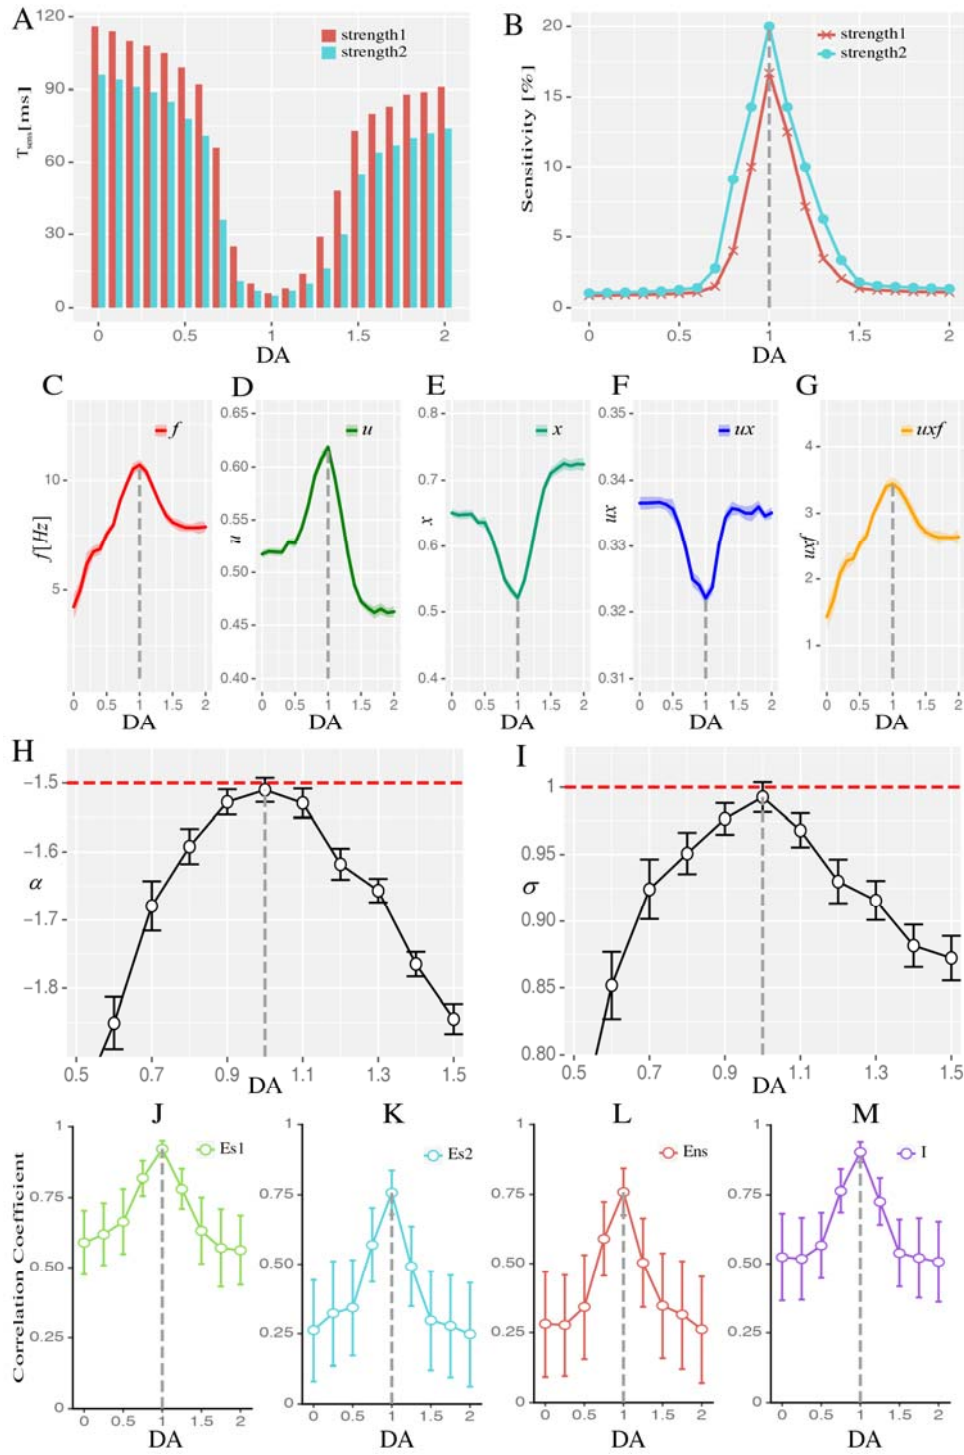

Fig. S1
